# Supplementary material for: Occurrence, abundance, and formation of atmospheric tarballs from a wide range of wildfires in the western US
Source: Copernicus journal article supplement (doi:10.5194/egusphere-2024-880), 2024-04-15
Supplement: Supplementary file 1 [file egusphere-2024-880-supplement.pdf]

# Supporting Information for Occurrence, abundance, and formation of atmospheric tarballs from a wide range of wildfires in the western US

5 Kouji Adachi<sup>1</sup>, Jack E. Dibb<sup>2</sup>, Joseph M. Katich<sup>3,4#</sup>, Joshua P. Schwarz<sup>3</sup>, Hongyu Guo<sup>4,5</sup>, Pedro Campuzano-Jost<sup>4,5</sup>, Jose L. Jimenez<sup>4,5</sup>, Jeff Peischl<sup>3</sup>, Christopher D. Holmes<sup>6</sup>, James Crawford<sup>7</sup>

<sup>1</sup>Department of Atmosphere, Ocean, and Earth System Modelling Research, Meteorological Research Institute, Tsukuba, Japan

<sup>2</sup>Institute for the Study of Earth, Oceans, and Space, University of New Hampshire, Durham, NH, USA

<sup>3</sup>Chemical Sciences Laboratory, National Oceanic and Atmospheric Administration, Boulder, CO, USA

<sup>4</sup>Cooperative Institute for Research in Environmental Sciences, University of Colorado Boulder, Boulder, CO, USA

10 <sup>5</sup>Department of Chemistry, University of Colorado Boulder, Boulder, CO, USA

<sup>6</sup>Earth, Ocean, and Atmospheric Science, Florida State University, Tallahassee, FL, USA

<sup>7</sup>NASA Langley Research Center, Hampton, VA, USA

<sup>#</sup>now at Ball Aerospace, Boulder, CO, USA

*Correspondence to:* Kouji Adachi (adachik@mri-jma.go.jp)

15

Supporting figures 1-3.

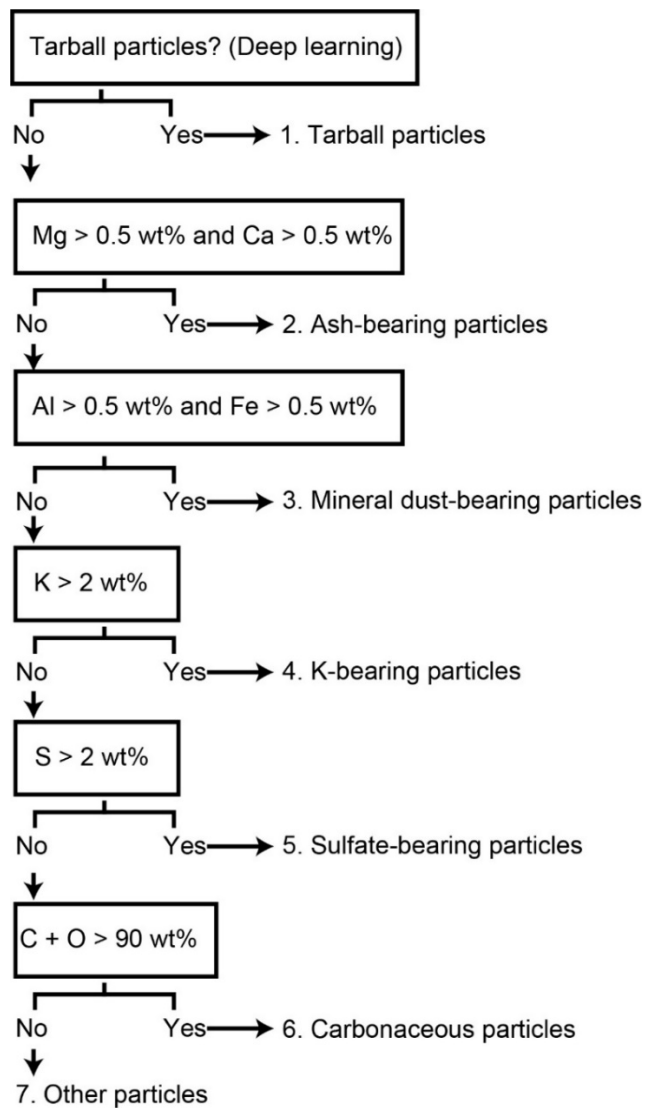

20

**Figure S1. The flow chart for classifying individual particles into seven categories based on an image analysis technique (Deep learning) and STEM-EDS measurements.**

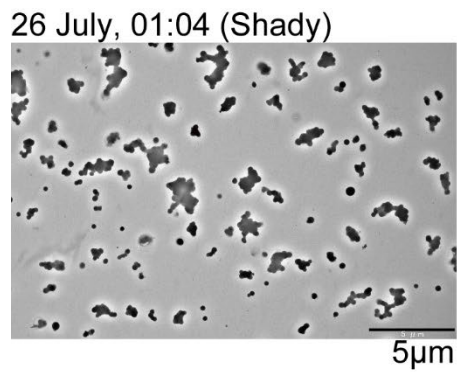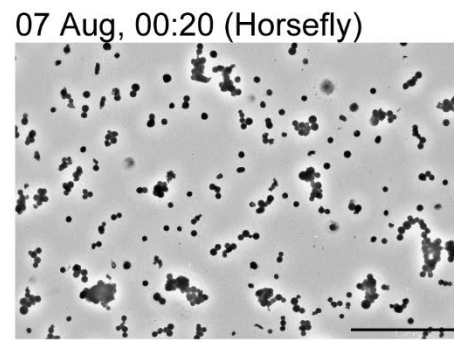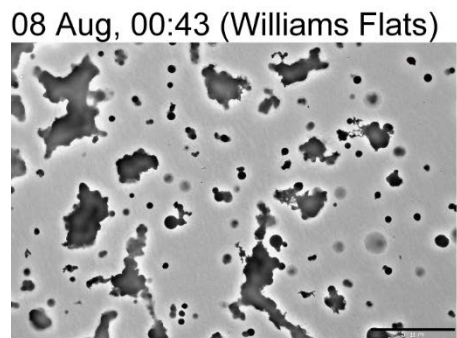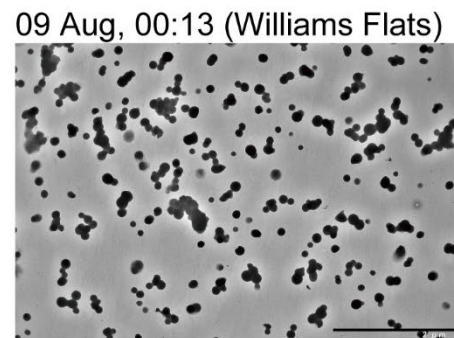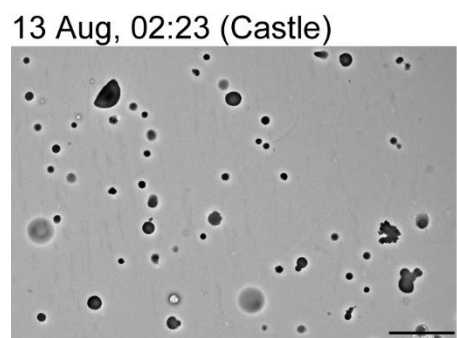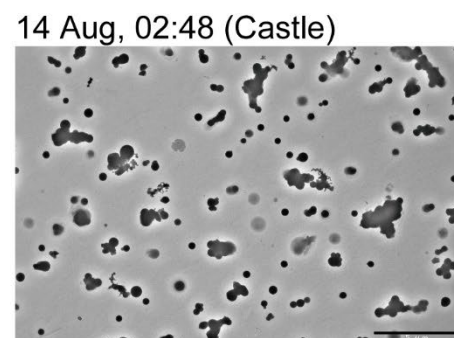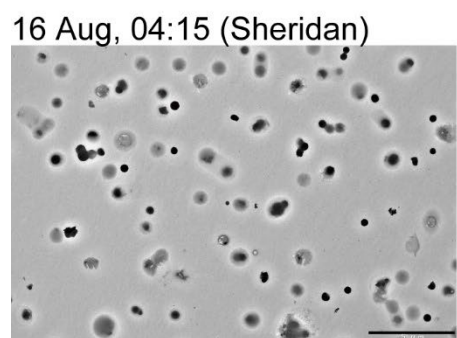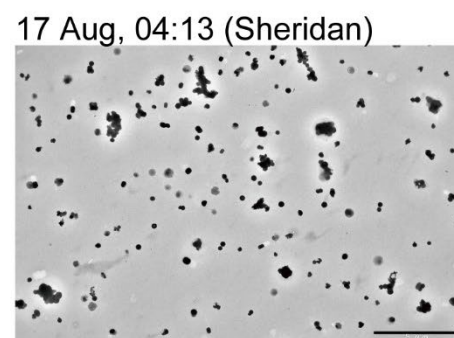

**Figure S2. Representative TEM images of samples containing TBs from each wildfire. Scale bars indicate 5  $\mu$ m. The header of each TEM image shows the sampling date and time (UTC) and the name of the wildfire.**

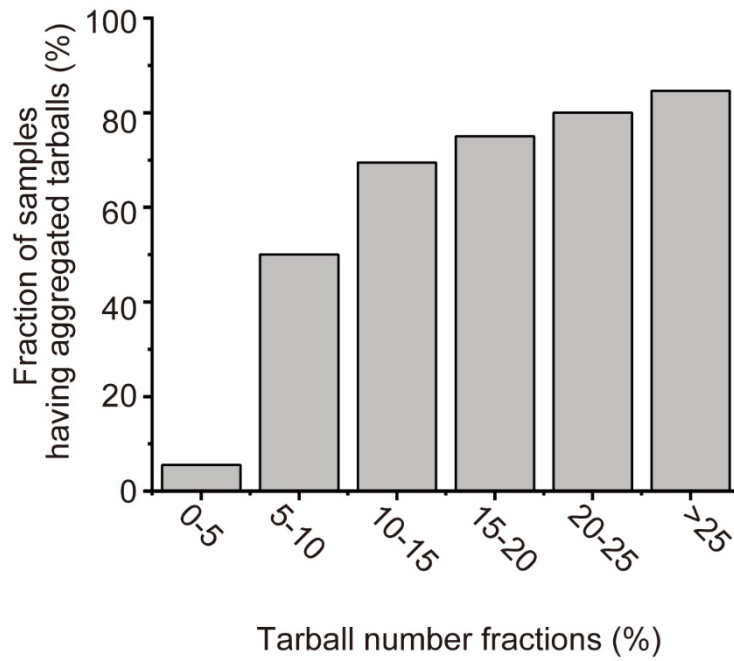

30 **Figure S3. Fractions of samples having aggregated TBs for samples with various TB number fractions. The number of samples containing TBs was 179, while those containing aggregated TBs were 84. n = 54, 50, 36, 16, 10, and 13 for the number of samples with TB fractions of 0%–5%, 5%–10%, 10%–15%, 15%–20%, 20%–25%, and >25%, respectively.**
